# Supplementary material for: Pathways to a Diagnosis of Autism Spectrum Disorder
Source: Atypon-hosted journal article supplement (doi:10.1176/appi.ps.201900518), 2020-08-04

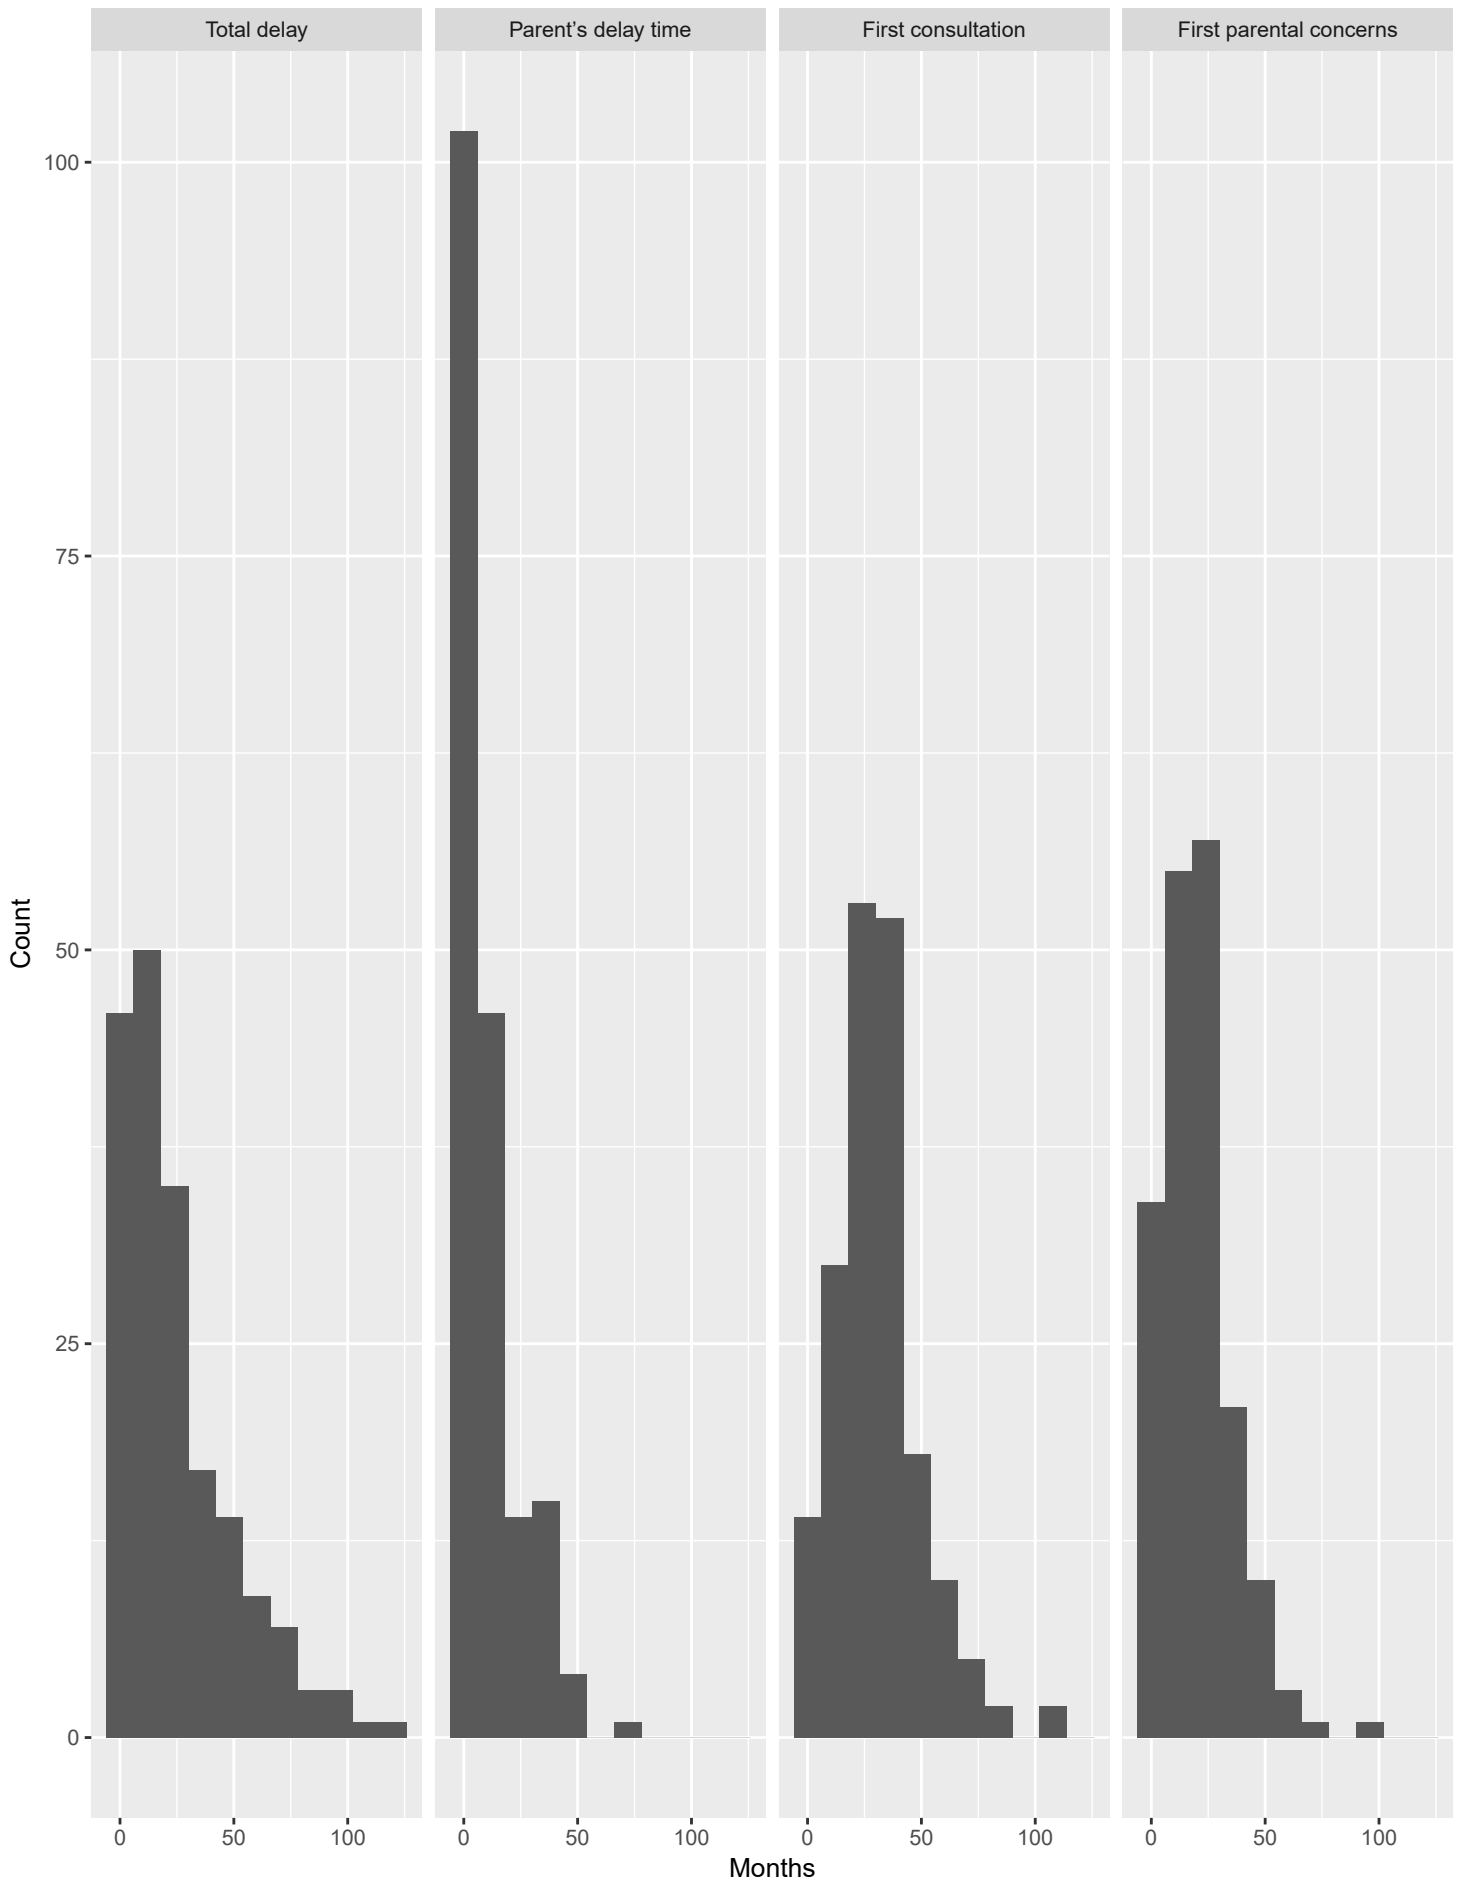

Histograms of the a) total delay, b) parents' delay time c) first consultation and d) first parental concerns. All plots show values to be highly skewed to the left.

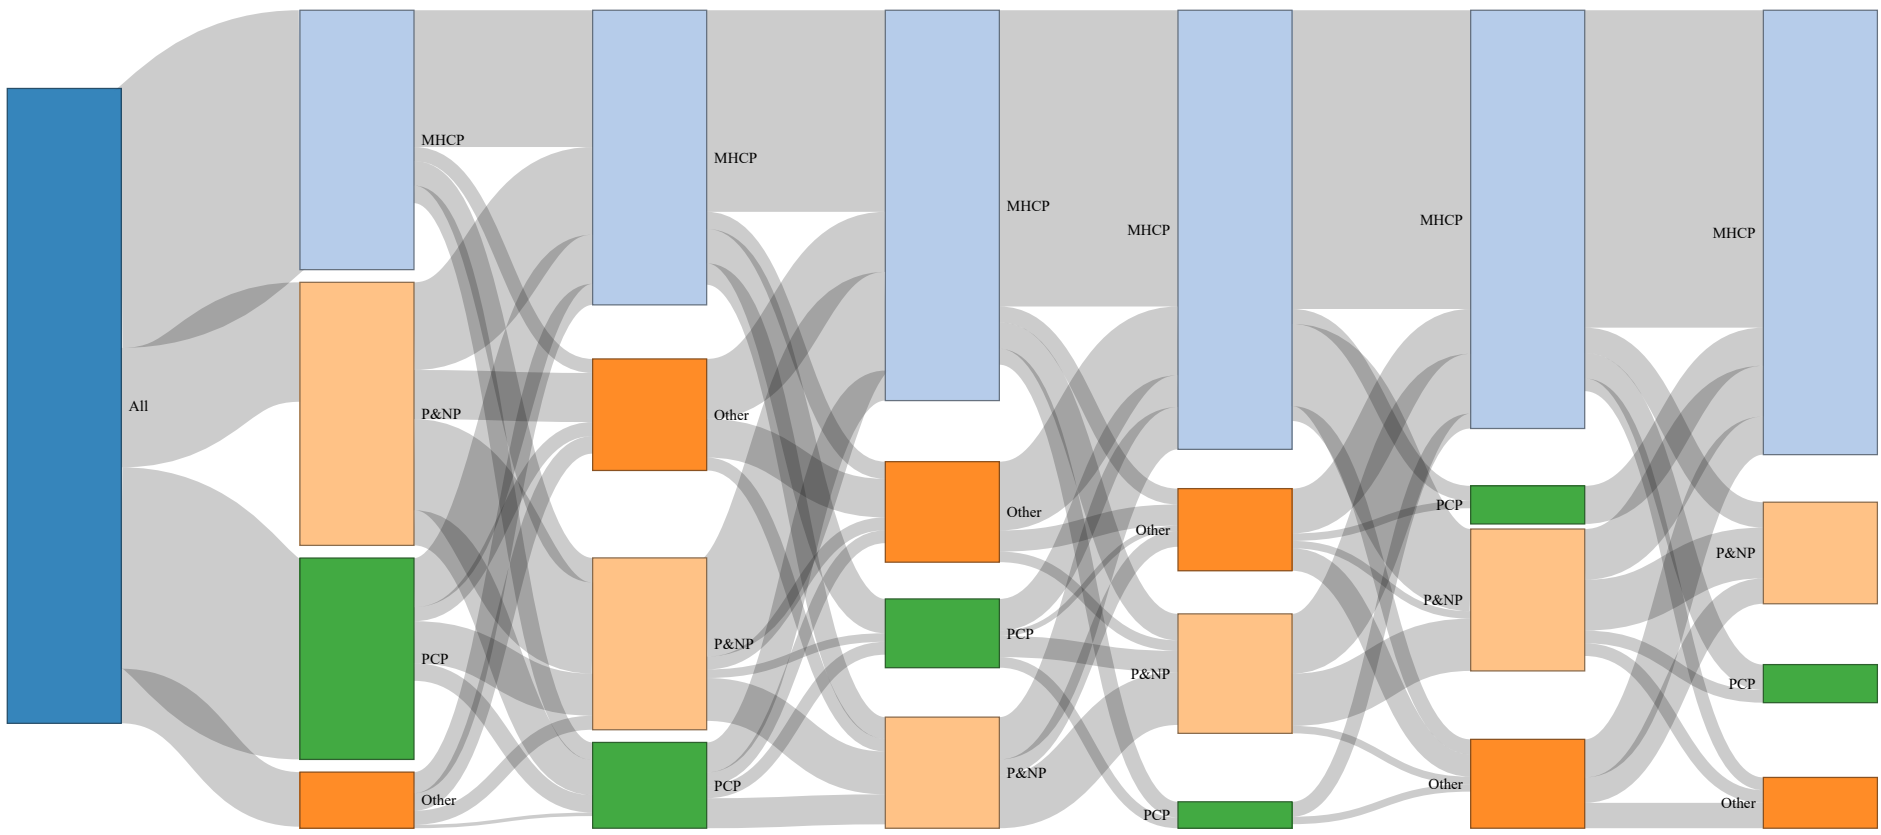

Supplement: appi.ps.201900518.ds001.pdf [file appi.ps.201900518.ds001.pdf]
